# Supplementary material for: Stable partial dislocation complexes in GaN investigated by molecular dynamics and first-principles simulations
Source: Royal Society of Chemistry journal article supplement (doi:10.1039/d5tc01812a), 2025-01-01
Supplement: d5tc01812a1.pdf [file d5tc01812a1.pdf]

**Supplementary information for**

**Stable partial dislocation complexes in GaN by molecular dynamics and first-principle simulations**

Andrey Sarikov<sup>1,2,3,\*</sup> and Ihor Kupchak<sup>1,4</sup>

<sup>1</sup> V. Lashkaryov Institute of Semiconductor Physics, National Academy of Sciences of Ukraine, 41 Nauky Avenue, 03028 Kyiv, Ukraine

<sup>2</sup> Educational Scientific Institute of High Technologies, Taras Shevchenko National University of Kyiv, 4-g Hlushkova Avenue, 03022 Kyiv, Ukraine

<sup>3</sup> National Technical University of Ukraine “Igor Sikorsky Kyiv Polytechnic Institute”, 37 Beresteiskyi Avenue, 03056 Kyiv, Ukraine

<sup>4</sup> University of Rome “Tor Vergata”, Via della Ricerca Scientifica 1, 00133 Rome, Italy

\* Corresponding author. E-mail:sarikov@isp.kiev.ua

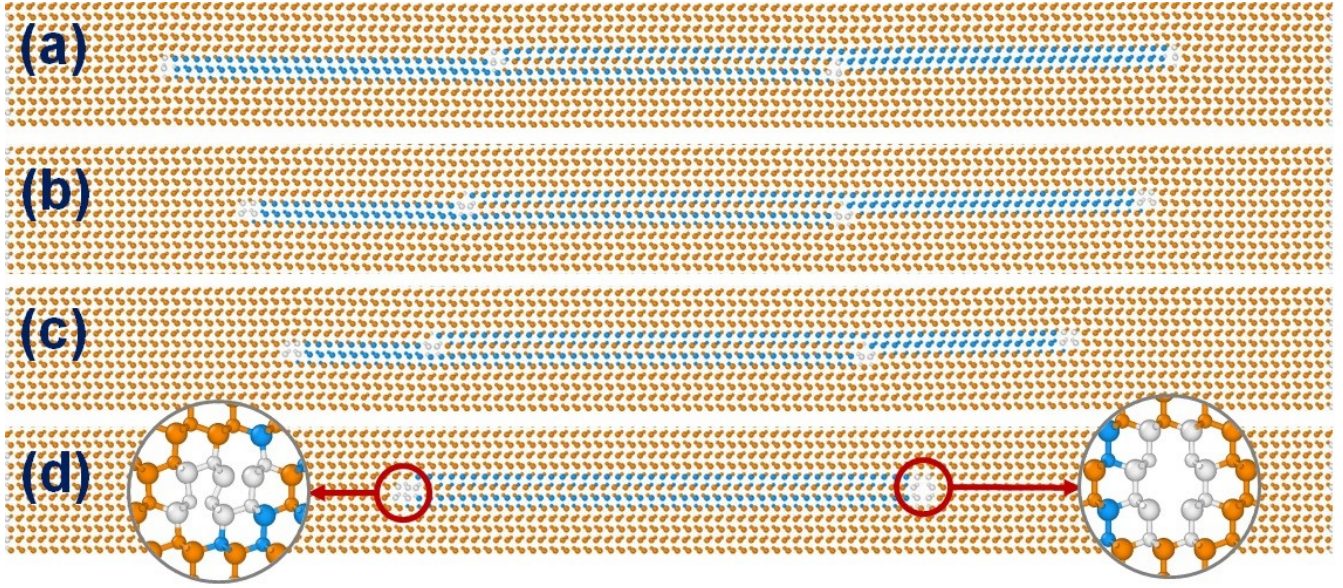

Figure 1. S. I. MD simulated evolution of the  $90^\circ$ - $90^\circ$  dislocation dipoles in wurtzite GaN. Simulated time: (a) – initial structure, (b) – 1.4 ns, (c) – 2.8 ns and (d) – 4.2 ns. The insets in panel (d) show enlarged atomic configurations of the formed stable dislocation complexes with zero total Burgers vectors.

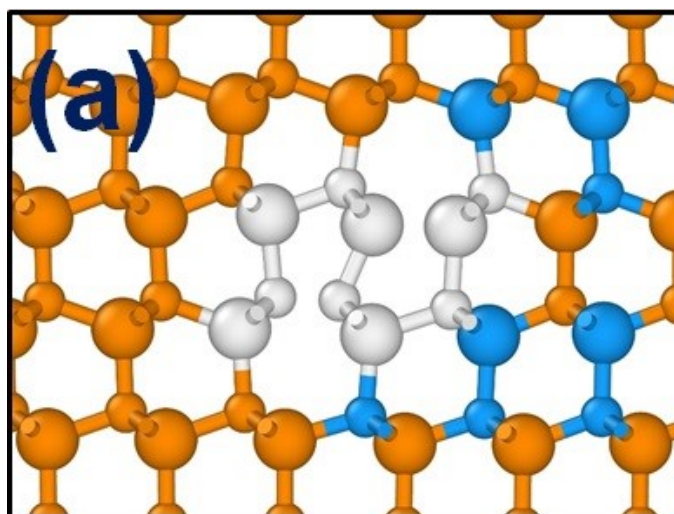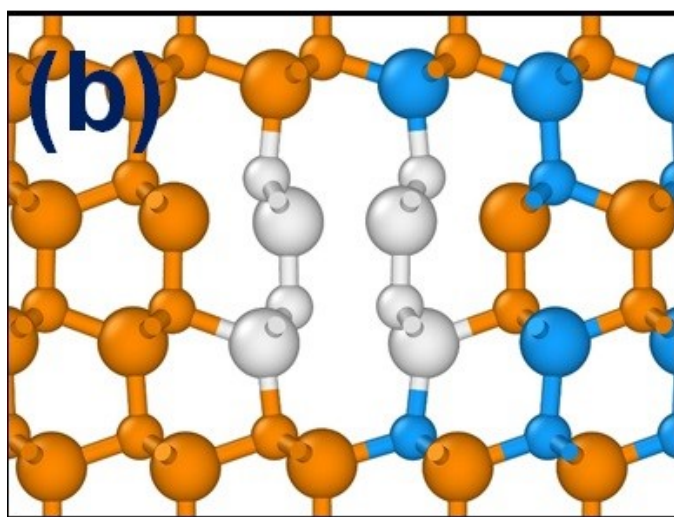

Figure 2 S. I. Atomic configuration of a flower-like  $90^\circ$ - $90^\circ$  Shockley partial dislocation complex obtained by molecular dynamics (a) and DFT (b) calculations.



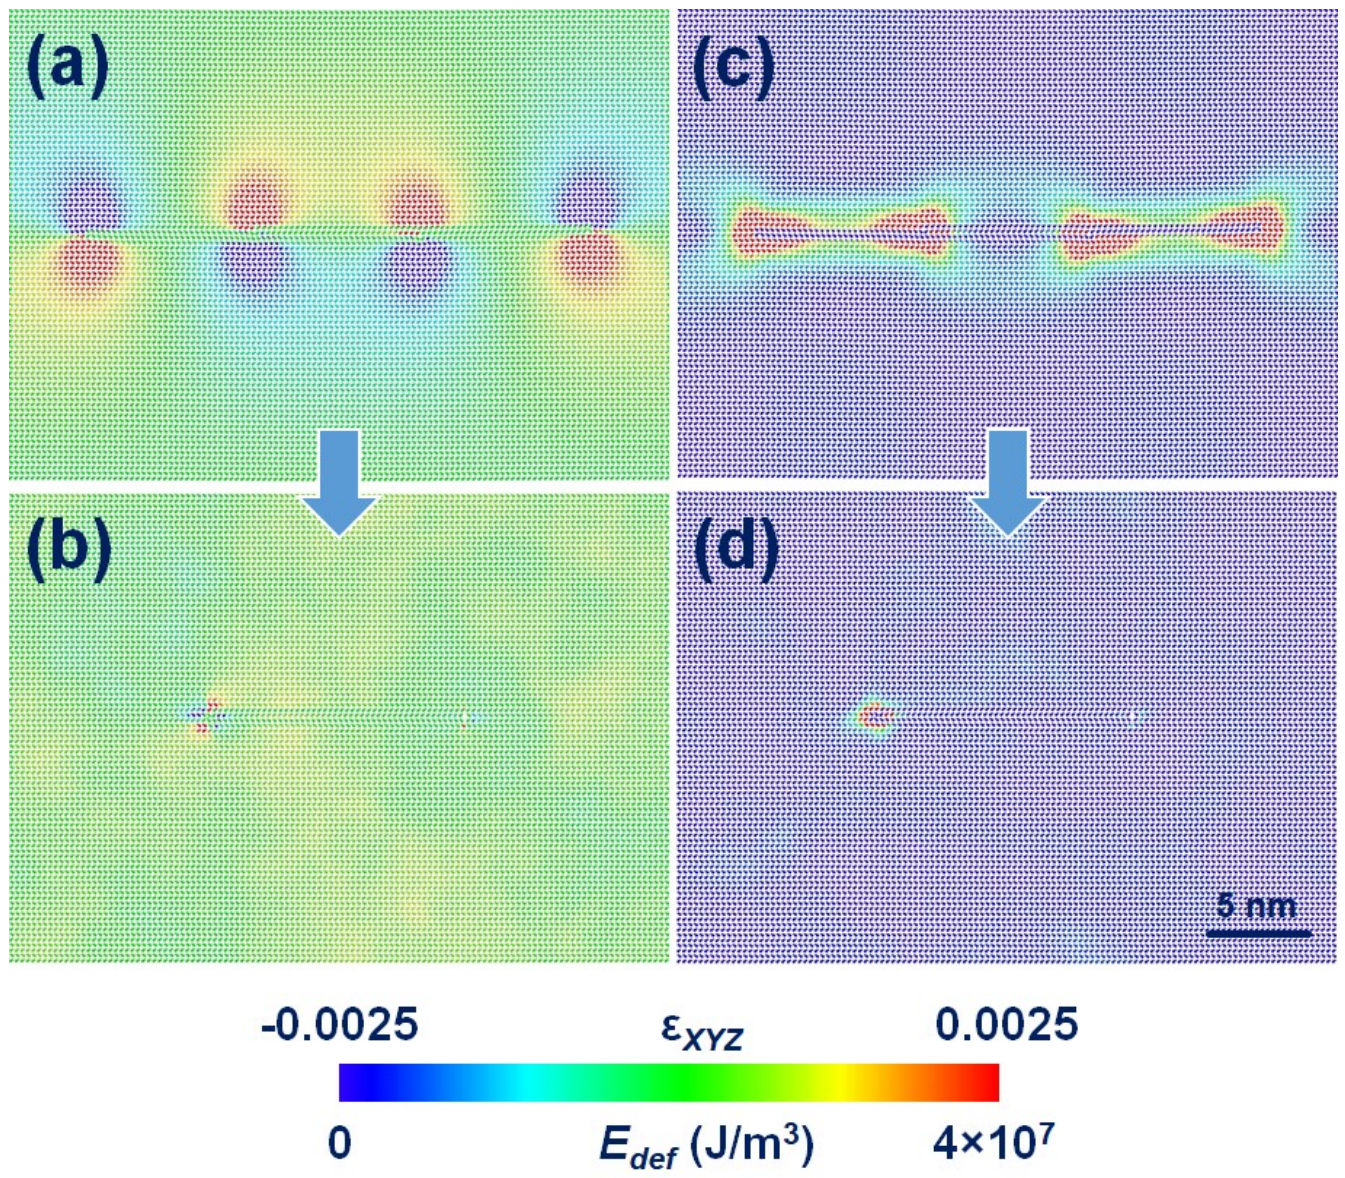

Figure 3 S. I. Distribution of volumetric strain (a, b) and elastic energy density (c, d) in the wurtzite GaN cell with  $90^\circ$ - $90^\circ$  dislocation dipoles before (a, c) and after (b, d) formation of double partial dislocation complexes.
